# Supplementary material for: Cypriot Teachers’ digital skills and attitudes towards AI
Source: Research Square preprint supplement (doi:10.21203/rs.3.rs-4662547/v1), 2024-08-01
Supplement: Supplementary file 1 [file dcbb90582cd2d037d7659dcf.pdf]

# Cypriot Teachers' digital skills and attitudes towards AI

Maria Kasinidou<sup>1\*</sup>, Styliani Kleanthoys<sup>1,2</sup> and Jahna Otterbacher<sup>1,2</sup>

<sup>1\*</sup>Open University of Cyprus, Giannou Kranidioti 89, 2231, Nicosia,  
Cyprus.

<sup>2</sup>CYENS Centre of Excellence, Dimarchou Lellou Demetriadi 23, 1016,  
Nicosia, Country.

\*Corresponding author(s). E-mail(s): [maria.kasinidou@ouc.ac.cy](mailto:maria.kasinidou@ouc.ac.cy);  
Contributing authors: [s.kleanthous@cyens.org.cy](mailto:s.kleanthous@cyens.org.cy);  
[jahna.otterbacher@ouc.ac.cy](mailto:jahna.otterbacher@ouc.ac.cy);
